# Supplementary material for: All-Atom Molecular Dynamics Simulations of the Temperature Response of Poly(glycidyl ether)s with Oligooxyethylene Side Chains Terminated with Alkyl Groups
Source: MDPI journal article supplement (doi:10.3390/nano13101628), 2023-05-12
Supplement: s1 [file s1]

# **All-Atom Molecular Dynamics Simulations of the Temperature Response of Poly(glycidyl Ether)s with Oligooxyethylene Side Chains Terminated with Alkyl Groups**

**Erika Terada <sup>1</sup>, Takuya Isono <sup>1,2</sup>, Toshifumi Satoh <sup>1,2</sup>, Takuya Yamamoto <sup>1,2</sup>, Toyoji Kakuchi <sup>3</sup> and Shinichiro Sato <sup>1,2,\*</sup>**

<sup>1</sup> Graduate School of Chemical Science and Engineering, Hokkaido University, Sapporo 060-8628, Japan; erika\_terada@eis.hokudai.ac.jp (E.T.)

<sup>2</sup> Faculty of Engineering, Hokkaido University, Sapporo 060-8628, Japan

<sup>3</sup> Research Center for Polymer Materials, School of Materials Science and Engineering, Changchun University of Science and Technology, Weixing Road 7989, Changchun 130012, China

\* Correspondence: s-sato@eng.hokudai.ac.jp

## **Table of Contents**

1. Additional Tables
2. Additional Figures

# 1. Additional Tables

**Table S1.** Total number of water molecules and box length.

| Sample ID                                  | Total Number of Water Molecules | Box Length                |
|--------------------------------------------|---------------------------------|---------------------------|
|                                            |                                 | Length, Width, Height (Å) |
| poly(MeGE) <sub>2.5k</sub>                 | 2321                            | 44.7, 43.5, 52.7          |
| poly(EtGE) <sub>2.5k</sub>                 | 2015                            | 44.2, 41.9, 49.0          |
| poly(MeEOGE) <sub>2.5k</sub>               | 2012                            | 42.1, 43.8, 49.0          |
| poly(EtEOGE) <sub>2.5k</sub>               | 2184                            | 45.6, 47.1, 45.0          |
| poly(MeEO <sub>2</sub> GE) <sub>2.5k</sub> | 2297                            | 44.5, 47.9, 47.0          |
| poly(EtEO <sub>2</sub> GE) <sub>2.5k</sub> | 2287                            | 46.6, 44.4, 48.3          |
| poly(MeGE) <sub>5k</sub>                   | 3182                            | 49.9, 53.0, 52.7          |
| poly(EtGE) <sub>5k</sub>                   | 3488                            | 58.3, 52.9, 49.0          |
| poly(MeEOGE) <sub>5k</sub>                 | 2471                            | 48.8, 44.4, 50.1          |
| poly(EtEOGE) <sub>5k</sub>                 | 2423                            | 47.7, 47.1, 48.0          |
| poly(MeEO <sub>2</sub> GE) <sub>5k</sub>   | 4213                            | 46.7, 66.1, 56.4          |
| poly(EtEO <sub>2</sub> GE) <sub>5k</sub>   | 3876                            | 54.8, 51.6, 58.0          |

**Table S2.** Calculated  $\bar{L}/L_{\max}$  of poly(EtEOGE) for molecular weights of 1250, 2500, and 5000.

| Polymer ID                    | Temperature (K) | $\bar{L}$ (Å) | $\bar{L}/L_{\max}$ | $1/\sqrt{N}$ | SD   | CV   |
|-------------------------------|-----------------|---------------|--------------------|--------------|------|------|
| poly(EtEOGE) <sub>1.25k</sub> | 278             | 13.56         | 0.41               | 0.35         | 0.12 | 0.30 |
|                               | 300             | 10.93         | 0.33               | 0.35         | 0.12 | 0.37 |
|                               | 323             | 11.51         | 0.35               | 0.35         | 0.11 | 0.32 |
|                               | 343             | 12.98         | 0.40               | 0.35         | 0.15 | 0.37 |
|                               | 368             | 13.41         | 0.41               | 0.35         | 0.14 | 0.35 |
| poly(EtEOGE) <sub>2.5k</sub>  | 278             | 16.39         | 0.25               | 0.24         | 0.05 | 0.20 |
|                               | 300             | 15.29         | 0.23               | 0.24         | 0.08 | 0.35 |
|                               | 323             | 13.05         | 0.20               | 0.24         | 0.07 | 0.34 |
|                               | 343             | 14.98         | 0.23               | 0.24         | 0.08 | 0.35 |
|                               | 368             | 15.94         | 0.24               | 0.24         | 0.09 | 0.35 |
| poly(EtEOGE) <sub>5k</sub>    | 278             | 27.56         | 0.22               | 0.17         | 0.05 | 0.23 |
|                               | 300             | 17.11         | 0.14               | 0.17         | 0.04 | 0.31 |
|                               | 323             | 14.82         | 0.12               | 0.17         | 0.04 | 0.36 |
|                               | 343             | 18.33         | 0.14               | 0.17         | 0.06 | 0.44 |
|                               | 368             | 18.47         | 0.15               | 0.17         | 0.05 | 0.32 |

**Table S3.** Calculated side chain lengths at each temperature.

| Polymer ID                                 | Temperature (K) | Side Chain Lengths (Å) | SD   | CV    |
|--------------------------------------------|-----------------|------------------------|------|-------|
| poly(MeGE) <sub>2.5k</sub>                 | 278             | 3.70                   | 0.04 | 0.010 |
|                                            | 300             | 3.70                   | 0.04 | 0.010 |
|                                            | 323             | 3.69                   | 0.04 | 0.012 |
|                                            | 343             | 3.67                   | 0.04 | 0.012 |
|                                            | 368             | 3.66                   | 0.04 | 0.012 |
| poly(EtGE) <sub>2.5k</sub>                 | 278             | 4.74                   | 0.04 | 0.009 |
|                                            | 300             | 4.72                   | 0.04 | 0.009 |
|                                            | 323             | 4.70                   | 0.05 | 0.010 |
|                                            | 343             | 4.69                   | 0.05 | 0.010 |
|                                            | 368             | 4.68                   | 0.05 | 0.011 |
| poly(MeEOGE) <sub>2.5k</sub>               | 278             | 6.30                   | 0.11 | 0.018 |
|                                            | 300             | 6.24                   | 0.12 | 0.020 |
|                                            | 323             | 6.20                   | 0.14 | 0.022 |
|                                            | 343             | 6.16                   | 0.14 | 0.023 |
|                                            | 368             | 6.13                   | 0.15 | 0.025 |
| poly(EtEOGE) <sub>2.5k</sub>               | 278             | 7.06                   | 0.24 | 0.034 |
|                                            | 300             | 7.01                   | 0.27 | 0.038 |
|                                            | 323             | 7.08                   | 0.28 | 0.039 |
|                                            | 343             | 7.11                   | 0.29 | 0.040 |
|                                            | 368             | 7.00                   | 0.30 | 0.043 |
| poly(MeEO <sub>2</sub> GE) <sub>2.5k</sub> | 278             | 8.08                   | 0.25 | 0.031 |
|                                            | 300             | 8.00                   | 0.27 | 0.034 |
|                                            | 323             | 8.08                   | 0.29 | 0.035 |
|                                            | 343             | 8.01                   | 0.30 | 0.038 |
|                                            | 368             | 7.97                   | 0.32 | 0.040 |
| poly(EtEO <sub>2</sub> GE) <sub>2.5k</sub> | 278             | 8.54                   | 0.38 | 0.044 |
|                                            | 300             | 8.54                   | 0.39 | 0.045 |
|                                            | 323             | 8.49                   | 0.40 | 0.047 |
|                                            | 343             | 8.56                   | 0.40 | 0.047 |
|                                            | 368             | 8.55                   | 0.40 | 0.047 |

**Table S4.** Average numbers of hydrogen bonds within an intra-polymer calculated over 20 ns at 278K, 300K, 323K, 343K, and 368K.

| Polymer                    | LCST<br>(K) | Average Number of Intra-Polymers HBs in All O Atoms, (Per Oxygen in Polymer Residue) |       |       |       |       |
|----------------------------|-------------|--------------------------------------------------------------------------------------|-------|-------|-------|-------|
|                            |             | 278 K                                                                                | 300 K | 323 K | 343 K | 368 K |
| poly(MeGE)                 | 338.5       | 0.005                                                                                | 0.002 | 0.002 | 0.002 | 0.001 |
| poly(EtGE)                 | 283.3       | 0.004                                                                                | 0.002 | 0.002 | 0.002 | 0.002 |
| poly(MeEOGE)               | 364.6       | 0.003                                                                                | 0.002 | 0.002 | 0.002 | 0.002 |
| poly(EtEOGE)               | 314.3       | 0.003                                                                                | 0.003 | 0.003 | 0.002 | 0.002 |
| poly(MeEO <sub>2</sub> GE) | N.D.        | 0.002                                                                                | 0.002 | 0.002 | 0.002 | 0.002 |
| poly(EtEO <sub>2</sub> GE) | 331.2       | 0.002                                                                                | 0.002 | 0.003 | 0.003 | 0.002 |

## 2. Additional Figures

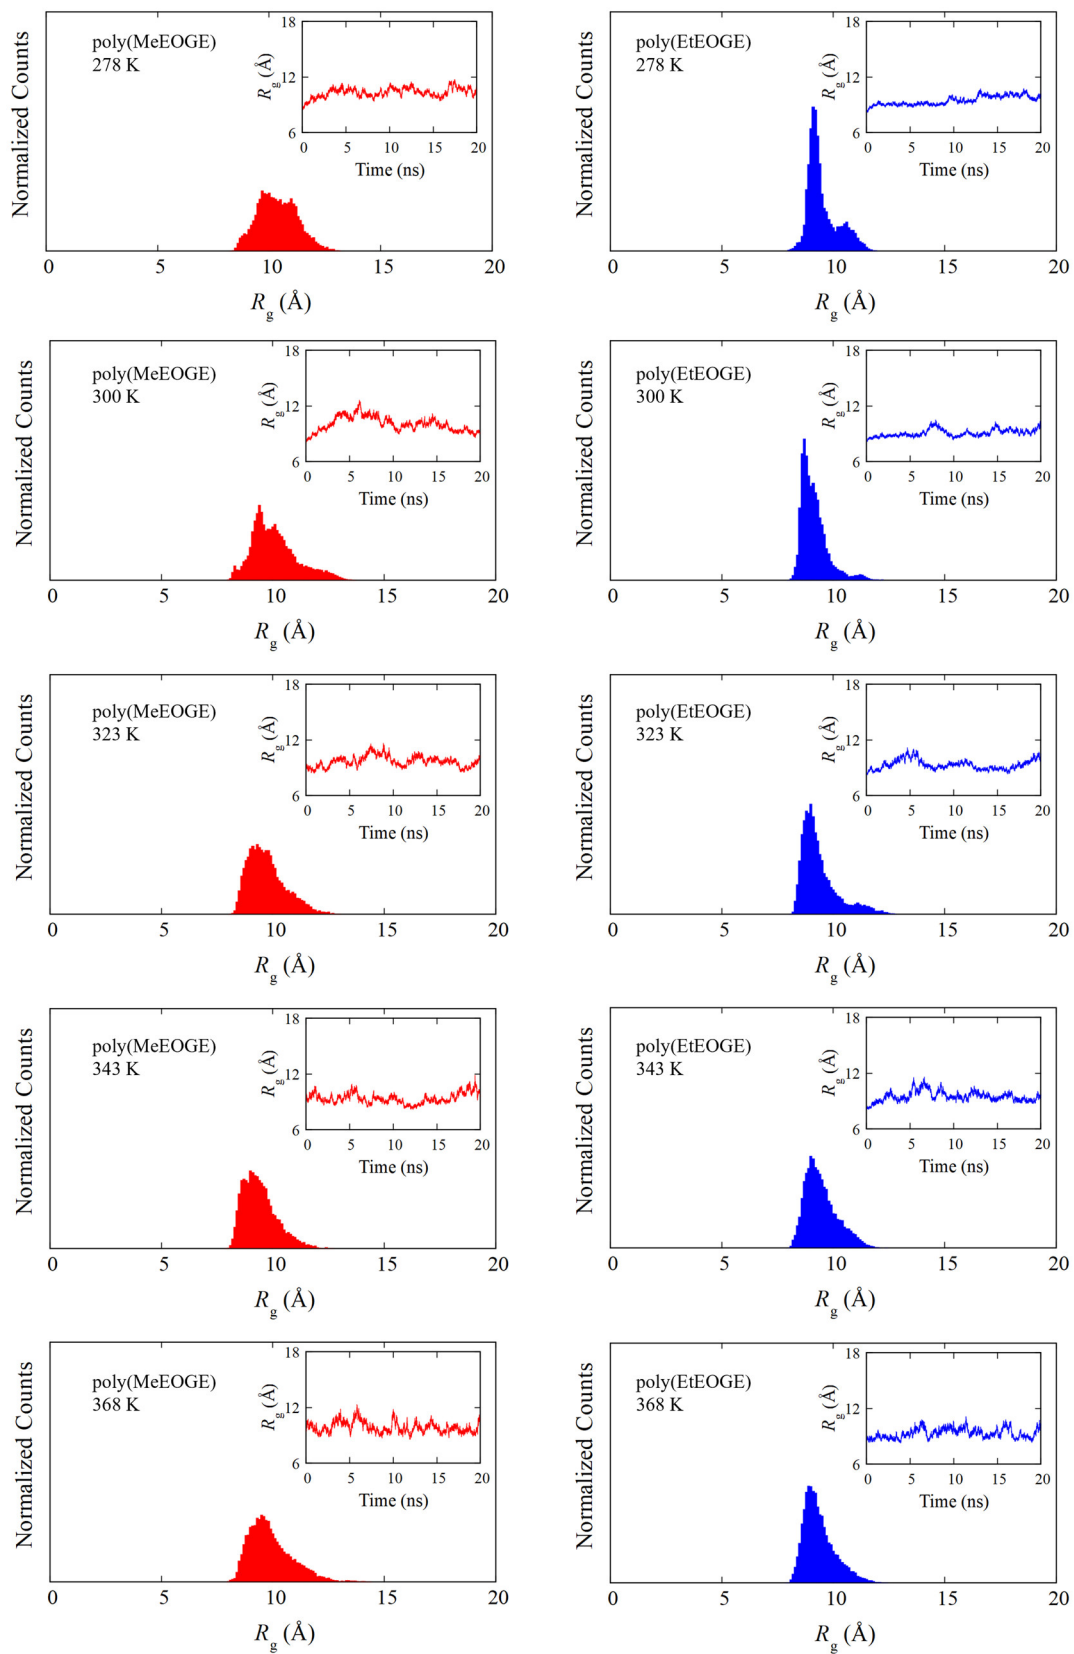

**Figure S1.**  $R_g$  distribution inserted for poly(MeEOGE)<sub>2.5k</sub> (left) and poly(EtEOGE)<sub>2.5k</sub> (right). The inset is the corresponding time dependence of  $R_g$ .

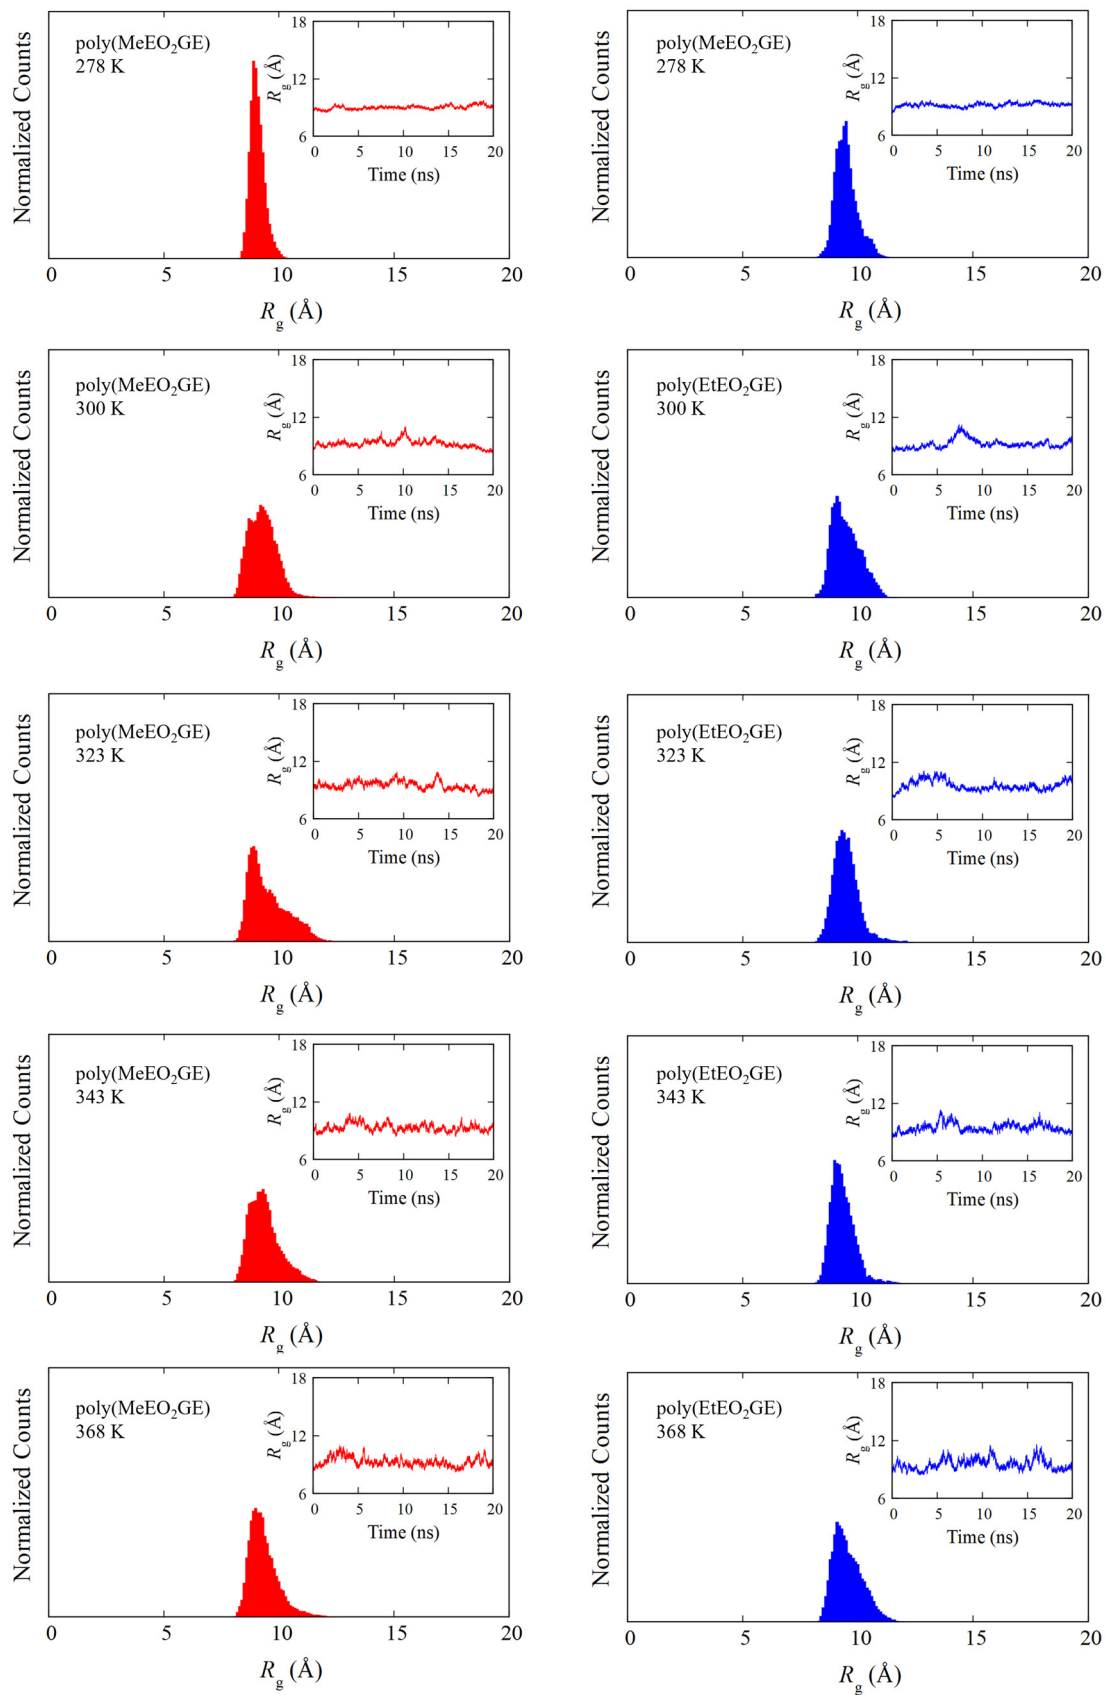

**Figure S2.**  $R_g$  distributions for poly(MeEO<sub>2</sub>GE)<sub>2.5k</sub> (left) and poly(EtEO<sub>2</sub>GE)<sub>2.5k</sub> (right). The inset is the corresponding time dependence of  $R_g$ .

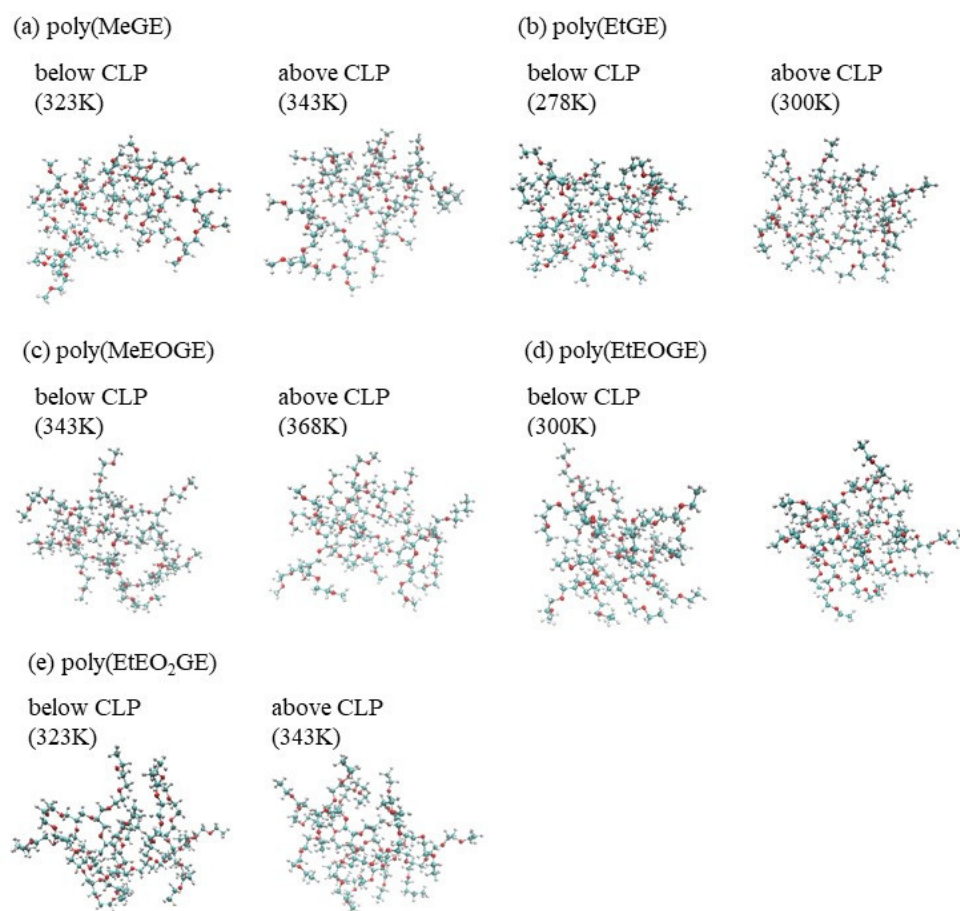

**Figure S3.** Snapshots of (a) poly(MeGE)<sub>2.5k</sub>, (b) poly(EtGE)<sub>2.5k</sub>, (c) poly(MeEOGE)<sub>2.5k</sub>, (d) poly(EtEOGE)<sub>2.5k</sub> and (e) poly(EtEO<sub>2</sub>GE)<sub>2.5k</sub> at the end of 20 ns below and above  $T_{CLP}$ . The carbon, oxygen, and hydrogen atoms of polymers are shown in green, red, and grey colors, respectively. Solvent water molecules have been omitted for clarity.



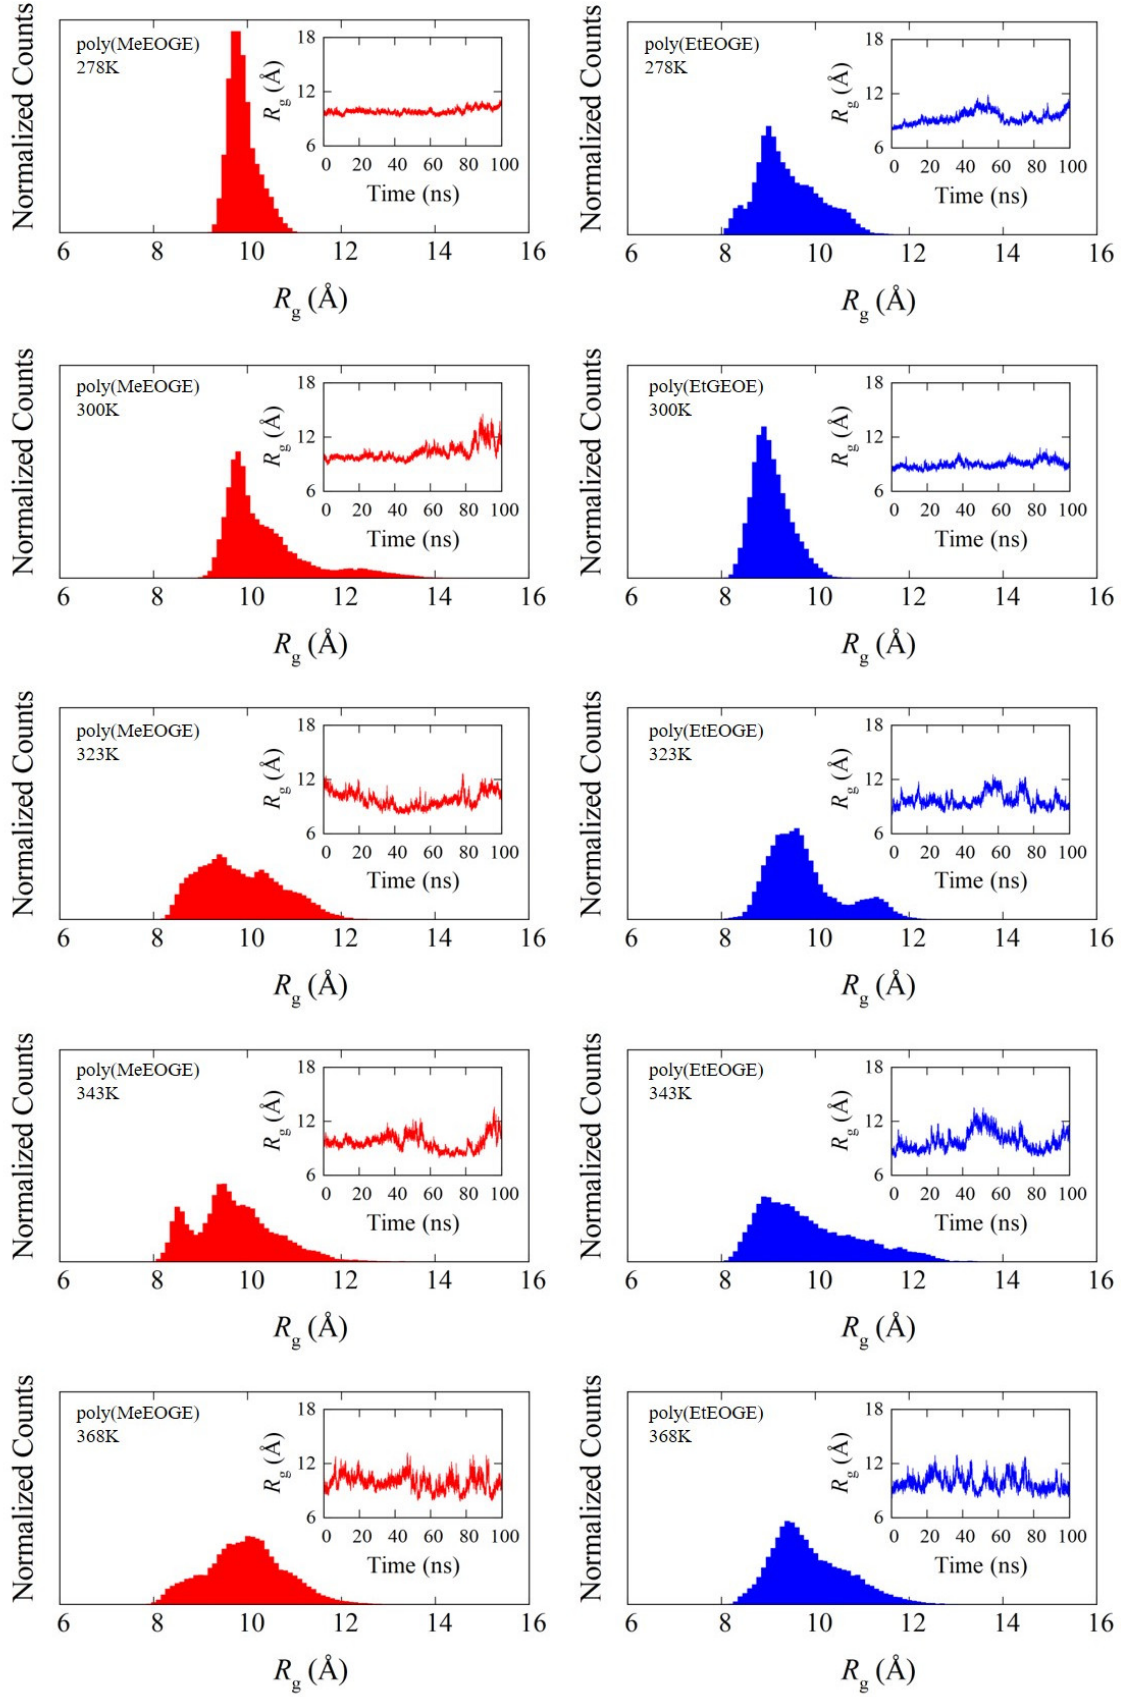

**Figure S4.**  $R_g$  distributions for poly(MeEOGE)<sub>5k</sub> (left) and poly(EtEOGE)<sub>5k</sub> (right). The inset is the corresponding time dependence of  $R_g$ .

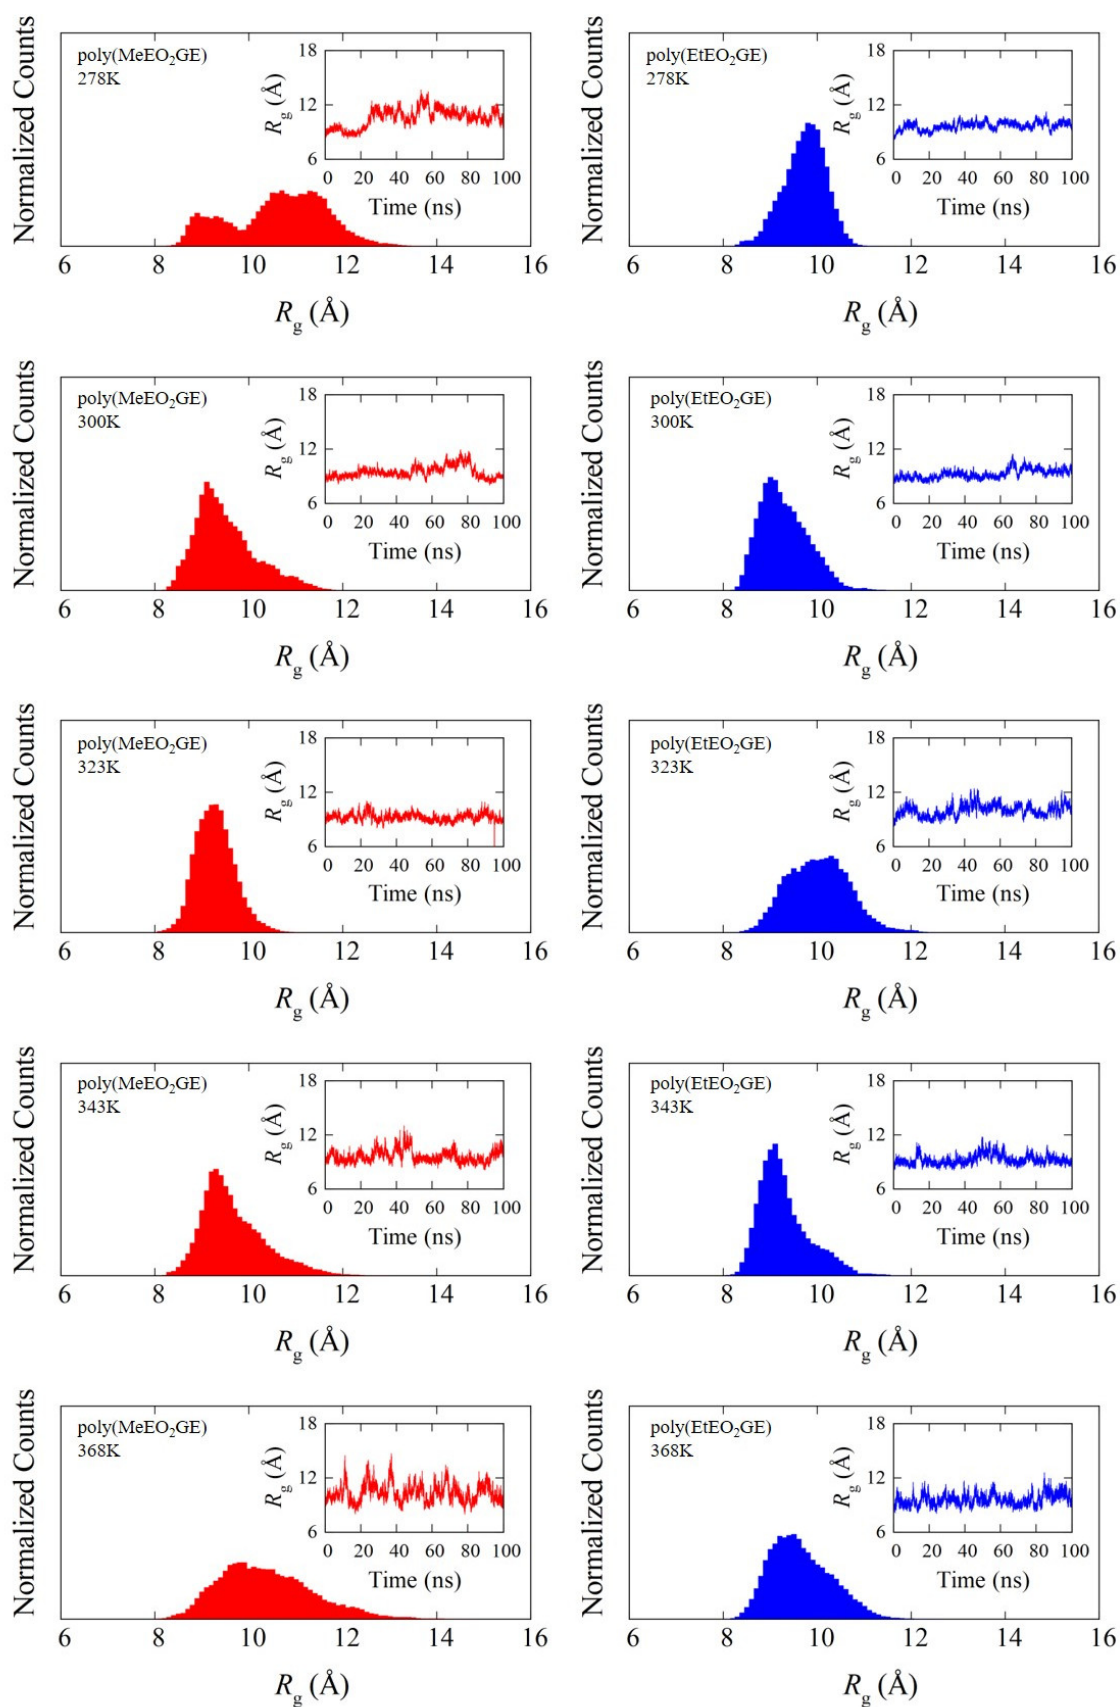

**Figure S5.**  $R_g$  distributions for poly(MeEO<sub>2</sub>GE)<sub>5k</sub> (left) and poly(EtEO<sub>2</sub>GE)<sub>5k</sub> (right). The inset is the corresponding time dependence of  $R_g$ .

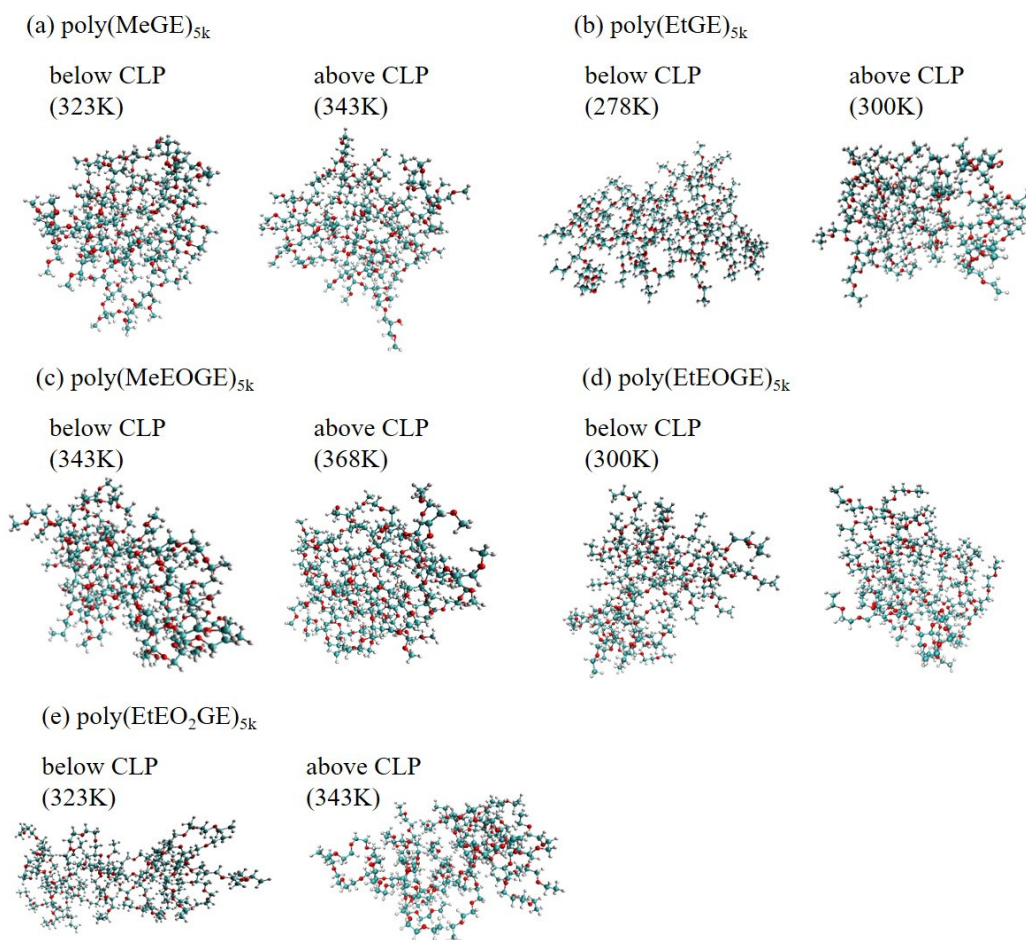

**Figure S6.** Snapshots of (a) poly(MeGE)<sub>5k</sub>, (b) poly(EtGE)<sub>5k</sub>, (c) poly(MeEOGE)<sub>5k</sub>, (d) poly(EtEOGE)<sub>5k</sub> and (e) poly(EtEO<sub>2</sub>GE)<sub>5k</sub> at the end of 20 ns below and above  $T_{CLP}$ . The carbon, oxygen, and hydrogen atoms of polymers are shown in green, red, and grey colors, respectively. Solvent water molecules have been omitted for clarity.

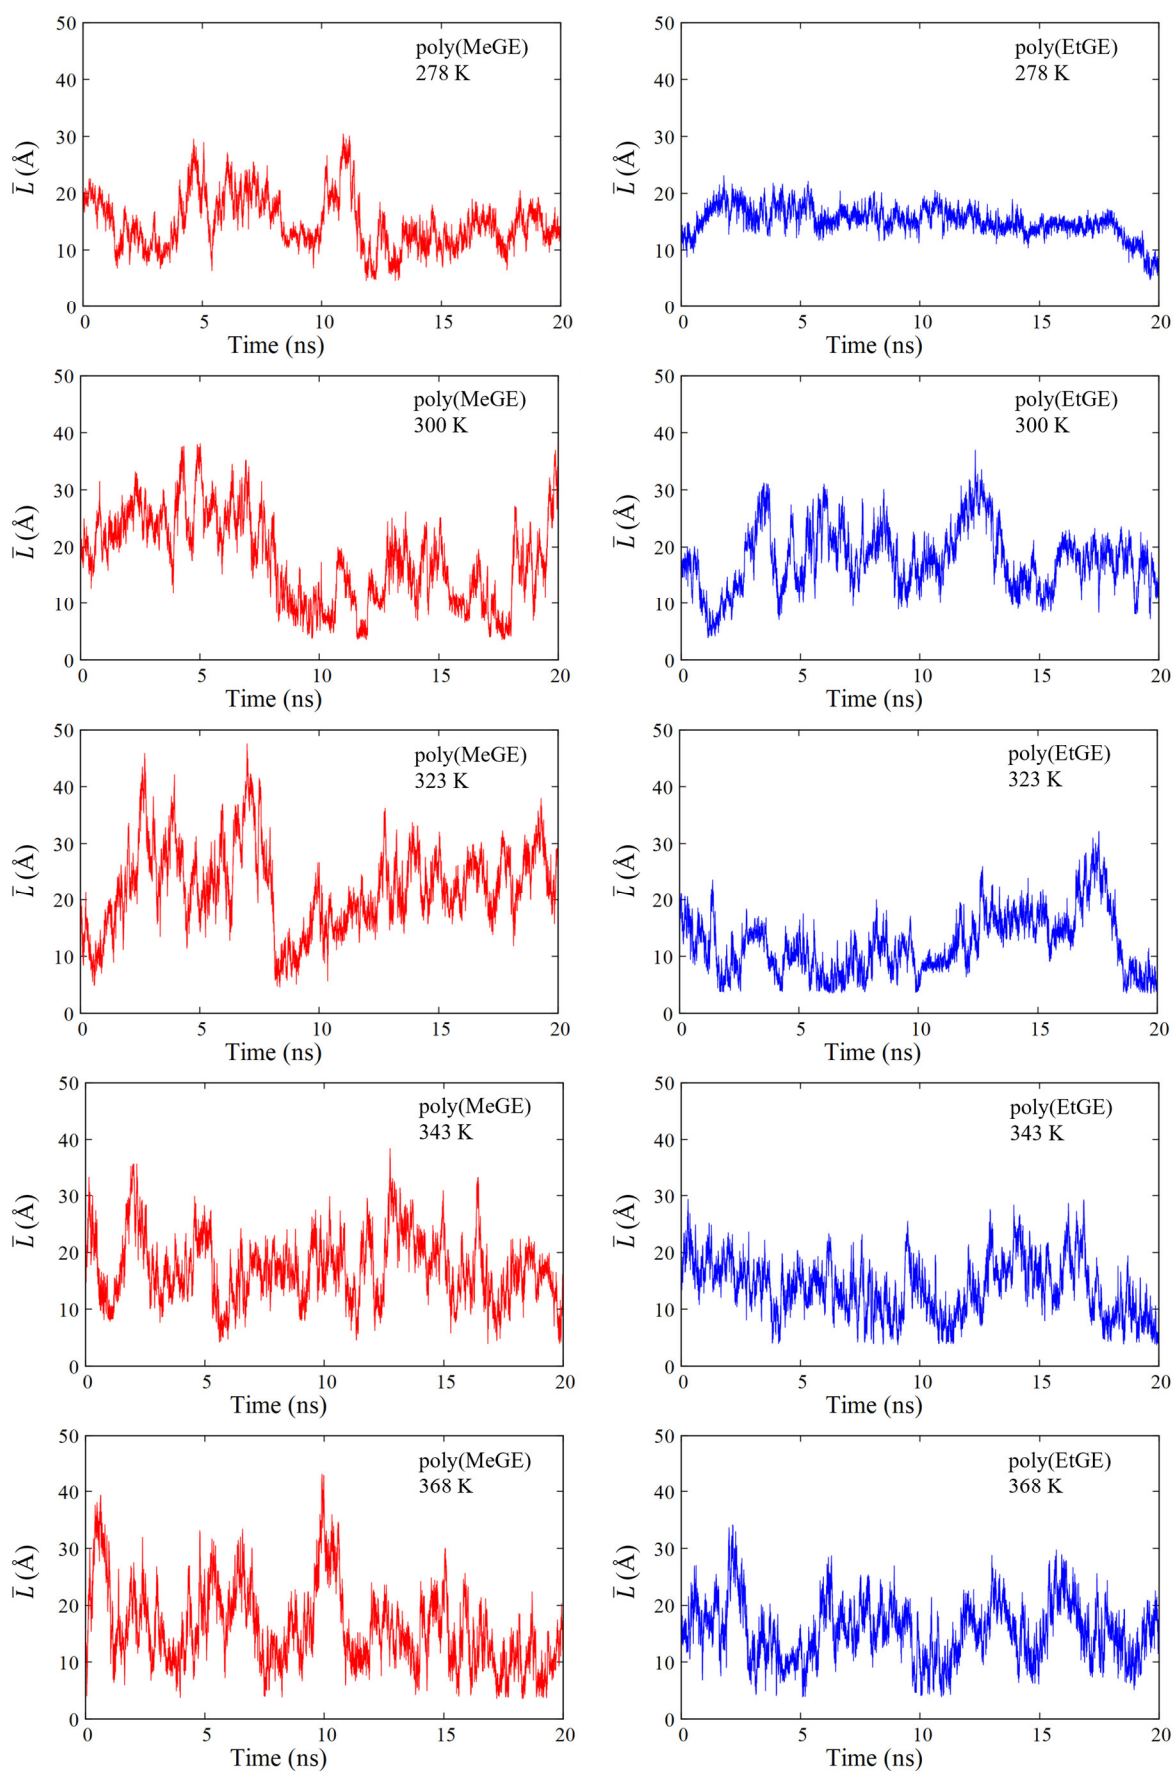

**Figure S7.** Time dependence of  $\bar{L}$  for poly(MeGE)<sub>2.5k</sub> (left) and poly(EtGE)<sub>2.5k</sub> (right).



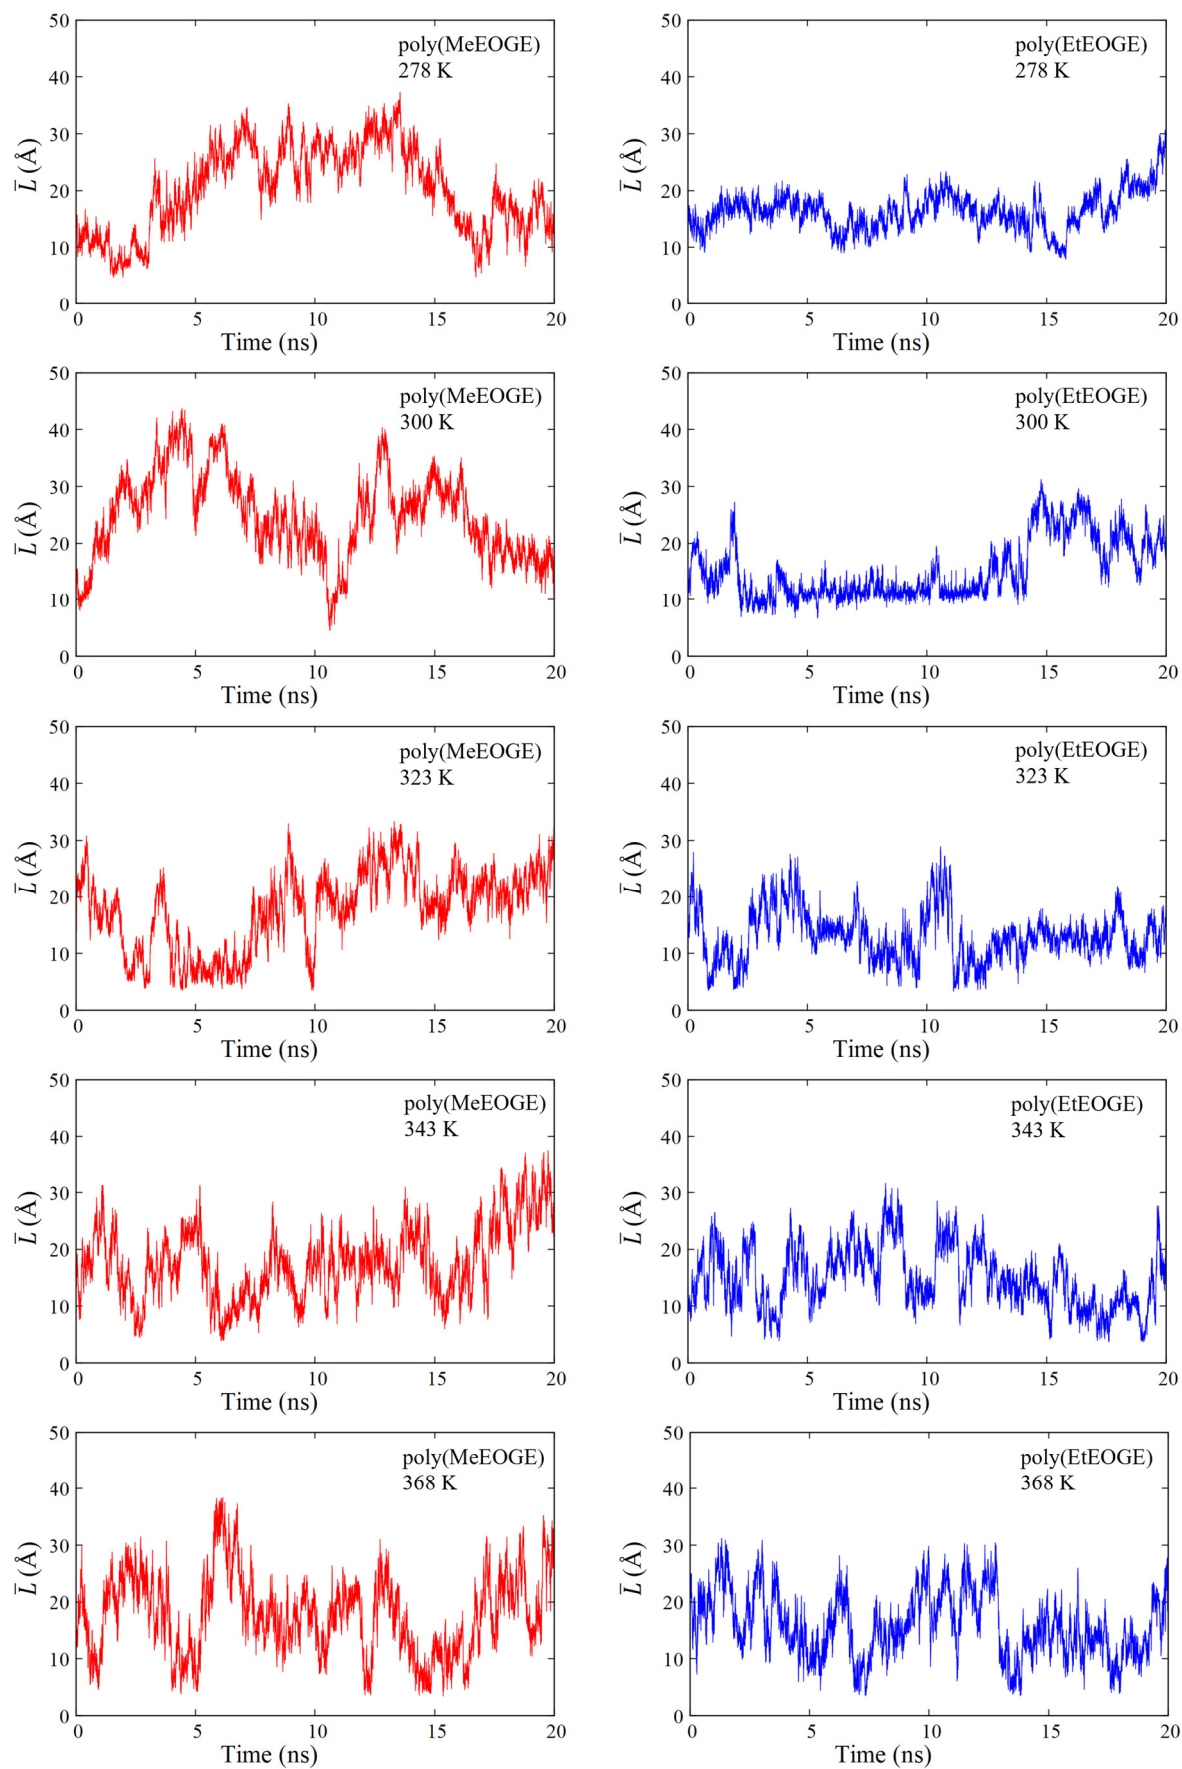

**Figure S8.** Time dependence of  $\bar{L}$  for poly(MeEOGE)<sub>2.5k</sub> (left) and poly(EtEOGE)<sub>2.5k</sub> (right).

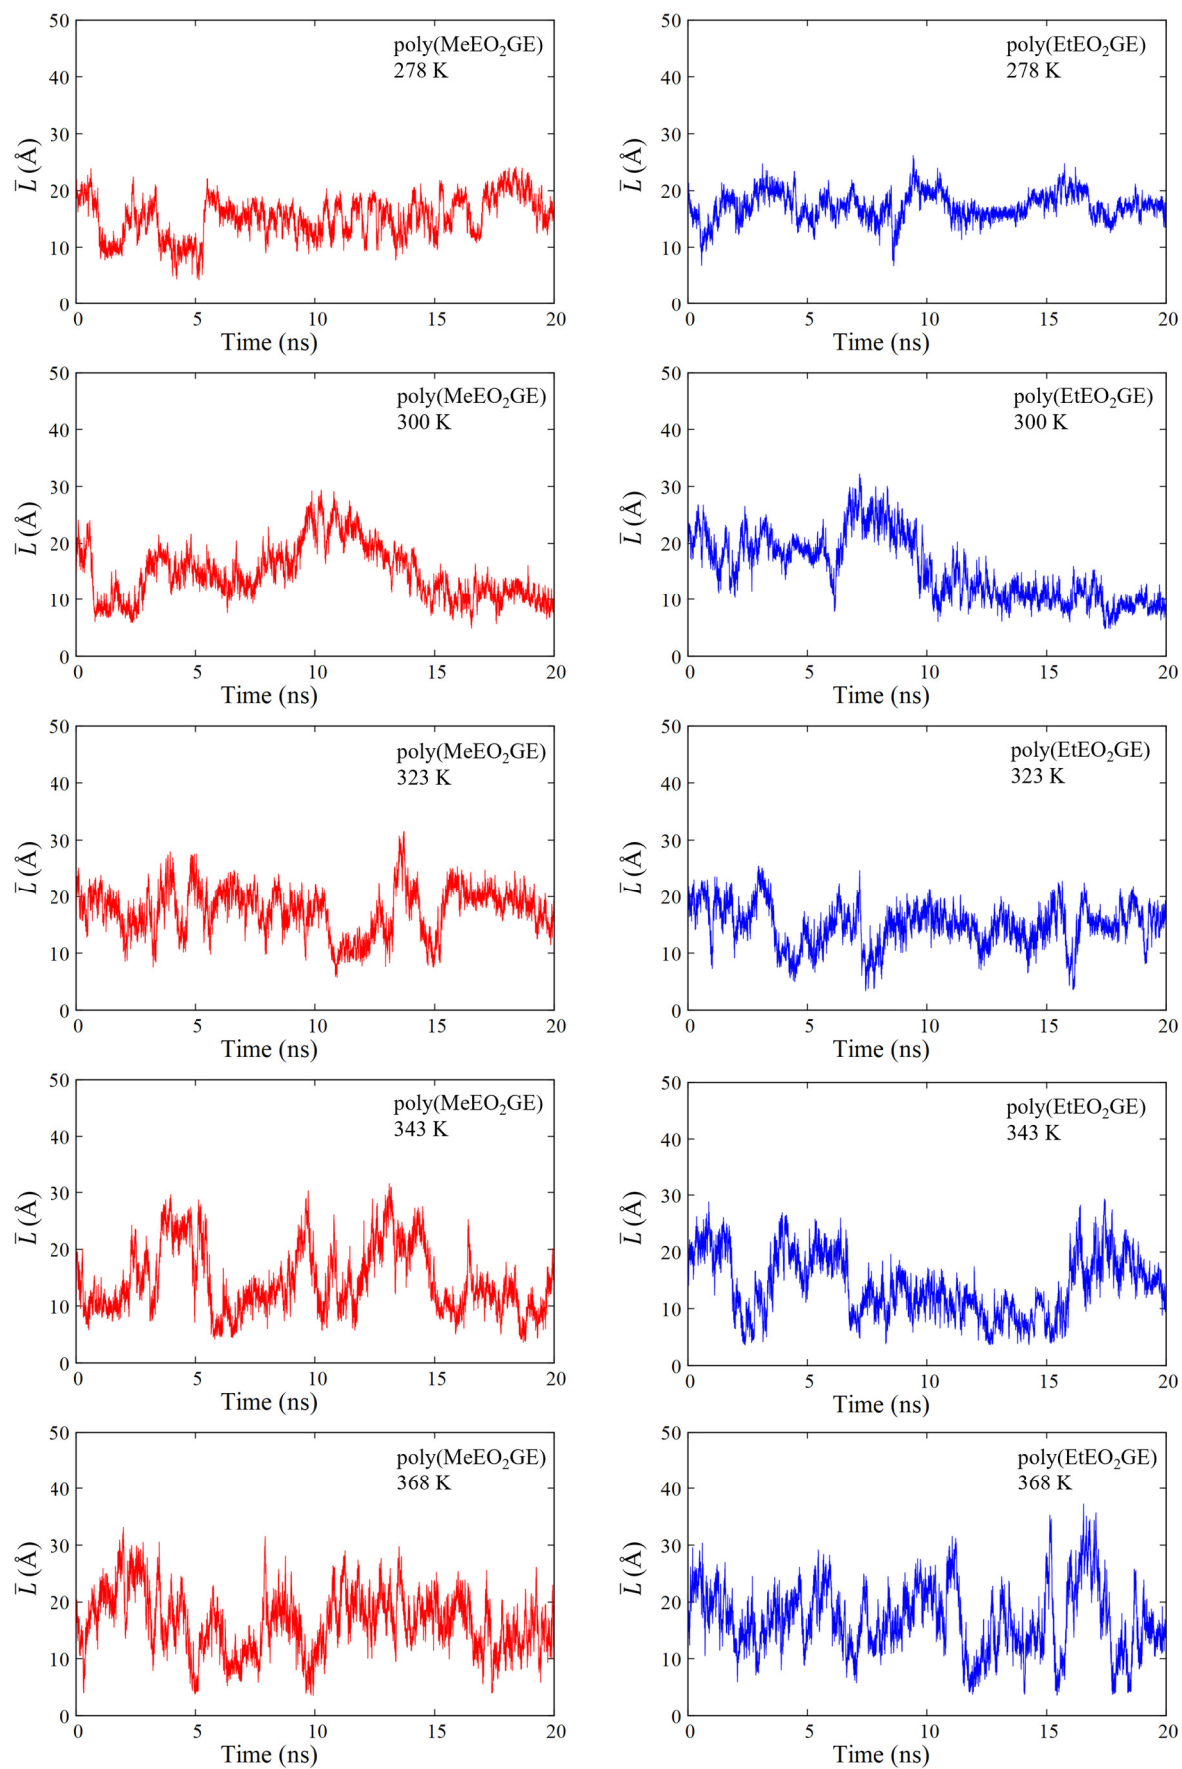

**Figure S9.** Time dependence of  $\bar{L}$  for poly(MeEO<sub>2</sub>GE)<sub>2.5k</sub> (left) and poly(EtEO<sub>2</sub>GE)<sub>2.5k</sub> (right).

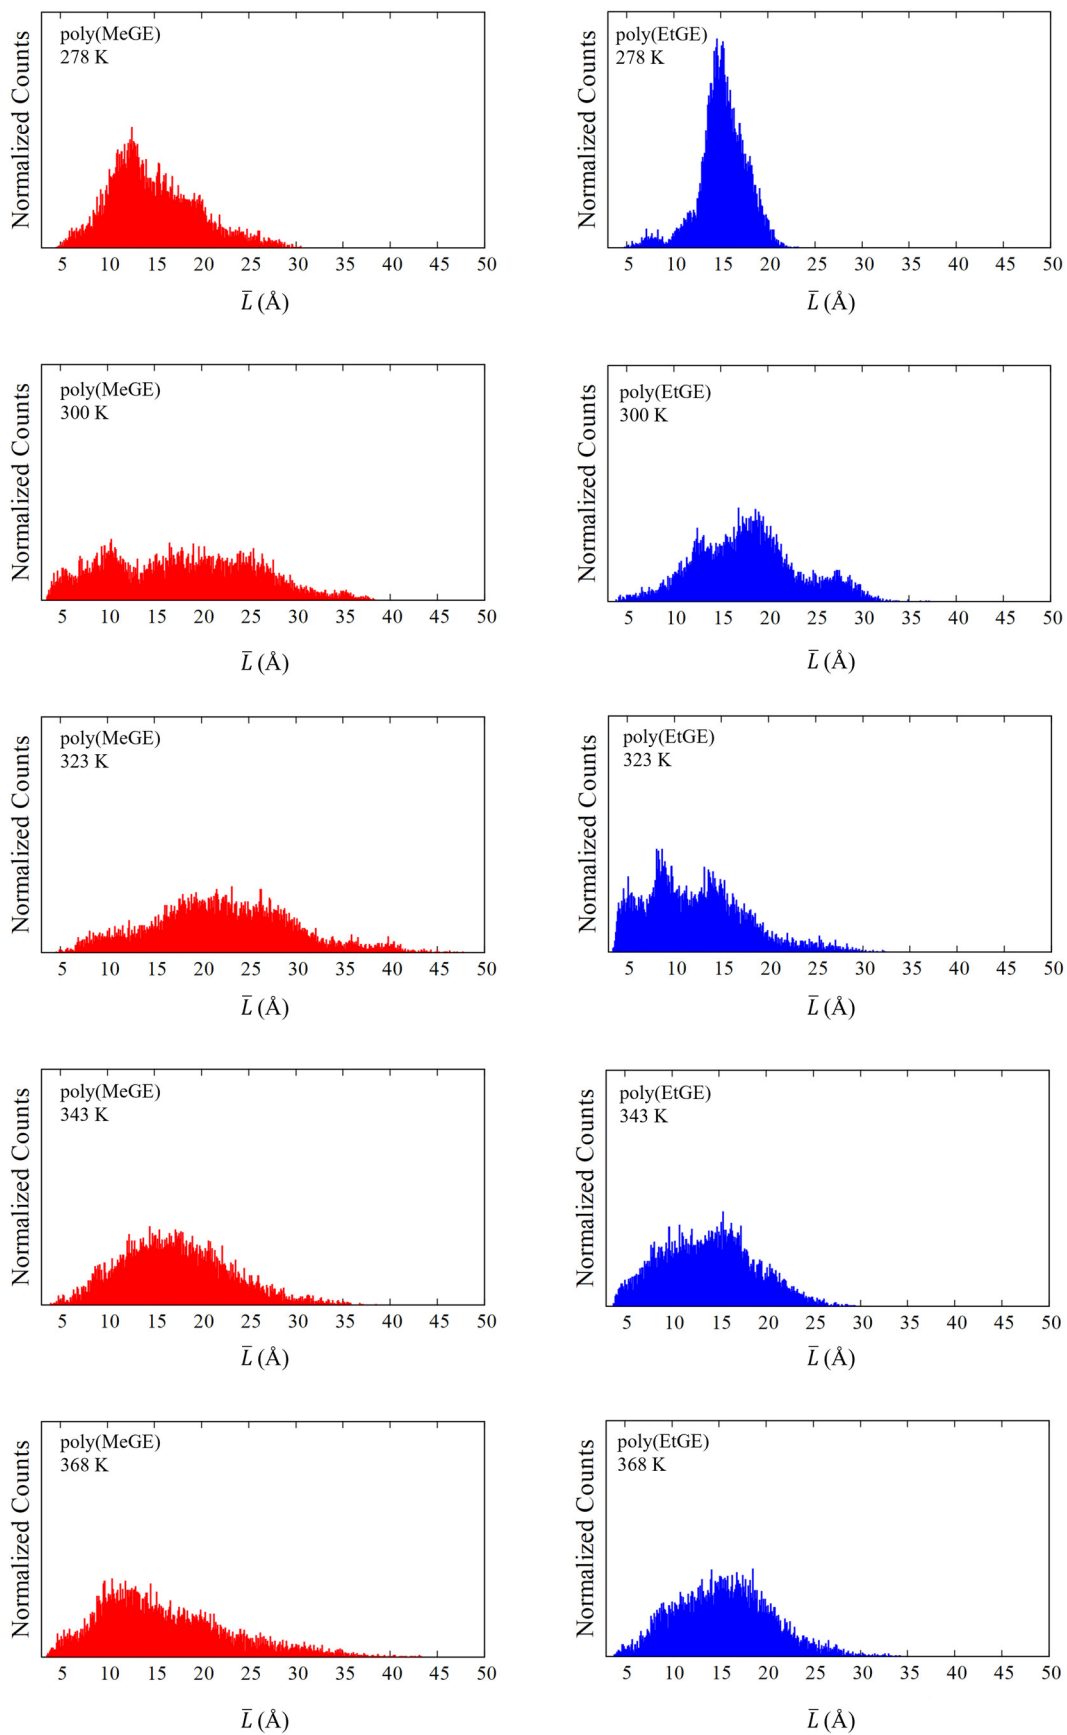

**Figure S10.**  $\bar{L}$  distribution for poly(MeGE)<sub>2.5k</sub> (left) and poly(EtGE)<sub>2.5k</sub> (right).

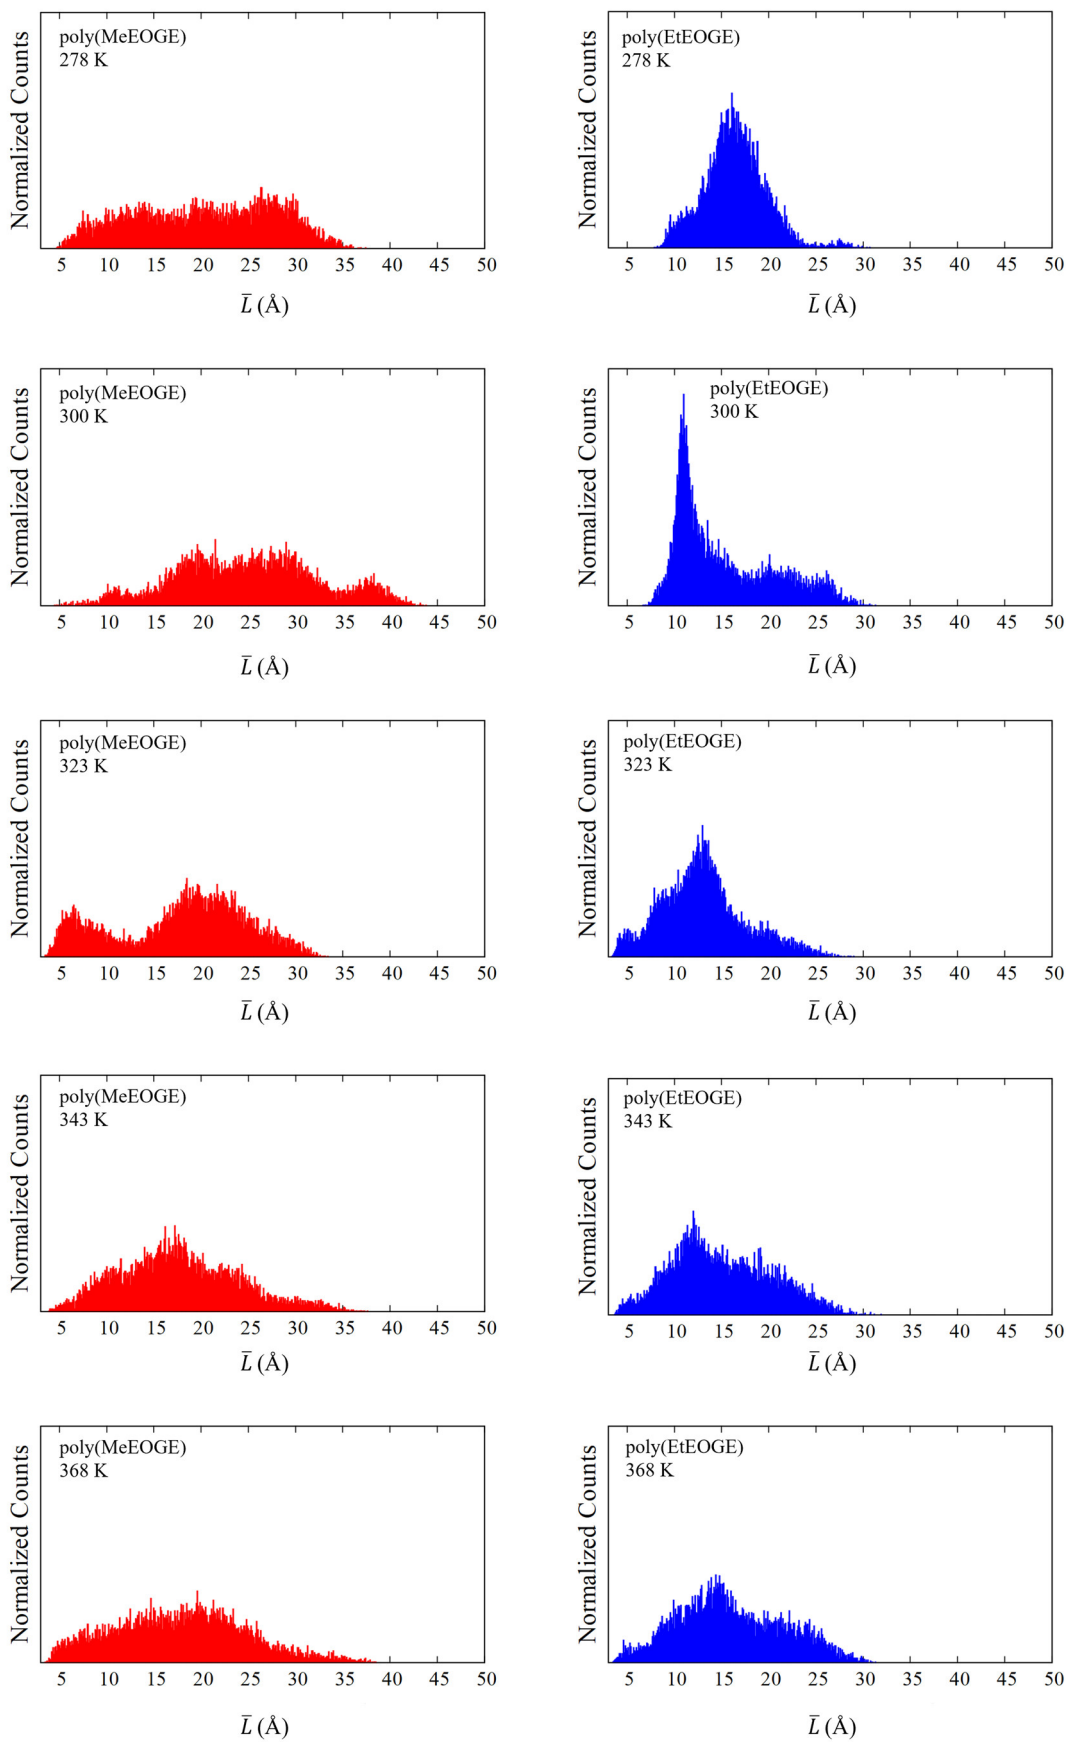

**Figure S11.**  $\bar{L}$  distribution for poly(MeEOGE)<sub>2.5k</sub> (left) and poly(EtEOGE)<sub>2.5k</sub> (right).



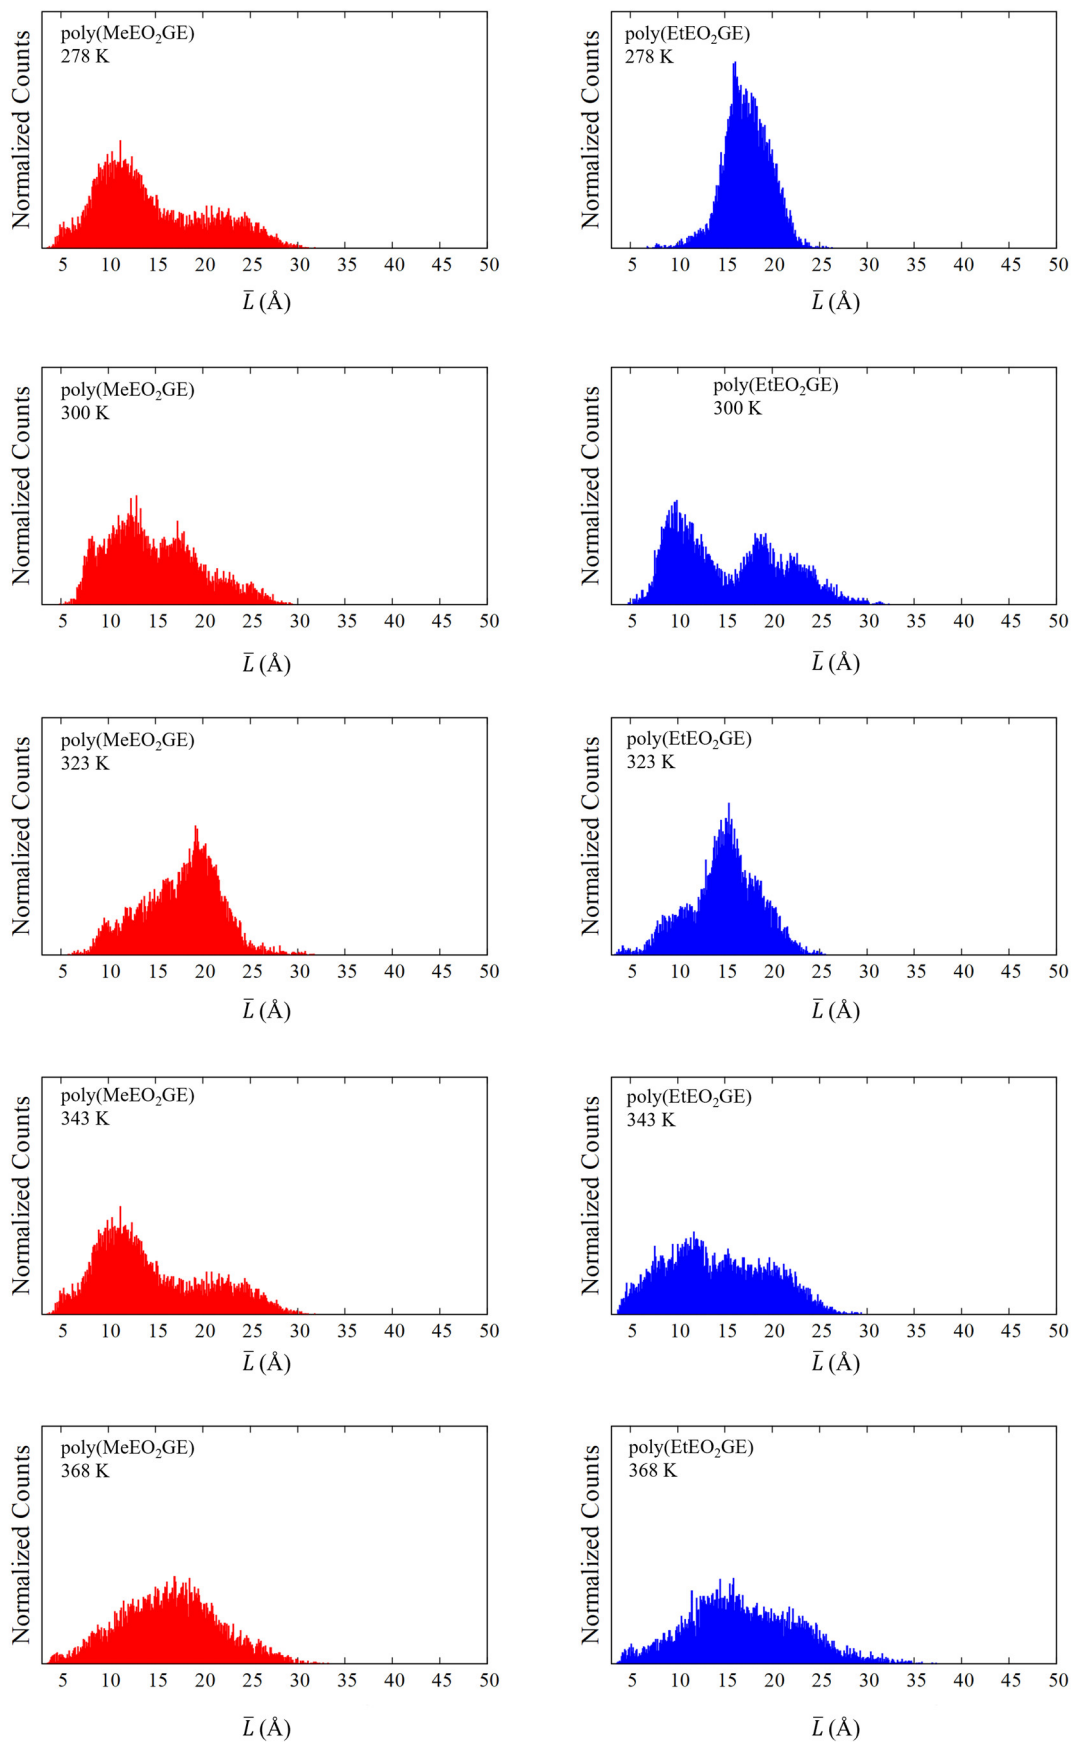

**Figure S12.**  $\bar{L}$  distribution for poly(MeEO<sub>2</sub>GE)<sub>2.5k</sub> (left) and poly(EtEO<sub>2</sub>GE)<sub>2.5k</sub> (right).
